# Supplementary material
Source: MDPI journal article supplement (https://www.mdpi.com/2072-4292/14/19/4904)
Supplement: s1 [file s1]

## Supplementary Materials

# Monitoring of Hydrological Resources in Surface Water Change by Satellite Altimetry: A Review and Perspectives

Wei Li <sup>1,2,3,4,\*</sup>, Xukang Xie <sup>1,3</sup>, Wanqiu Li <sup>5</sup>, Mark van der Meijde <sup>2</sup>, Haowen Yan <sup>1,3</sup>, Yutong Huang <sup>1,3</sup>, Xiaotong Li <sup>1,3</sup> and Qianwen Wang <sup>1,3</sup>

<sup>1</sup> Faculty of Geomatics, Lanzhou Jiaotong University, Lanzhou 730070, China

<sup>2</sup> Department of Earth Systems Analysis (ESA), Faculty of Geo-Information Science and Earth Observation (ITC), University of Twente, 7514 AE Enschede, The Netherlands

<sup>3</sup> National-Local Joint Engineering Research Center of Technologies and Applications for National Geographic State Monitoring, Lanzhou 730070, China

<sup>4</sup> School of Civil Engineering, Hexi University, Zhangye 734000, China

<sup>5</sup> School of Surveying and Geo-Informatics, Shandong Jianzhu University, Jinan 250101, China

\* Correspondence: geosci.wli@lztu.edu.cn; Tel.: +86-139-1996-9611

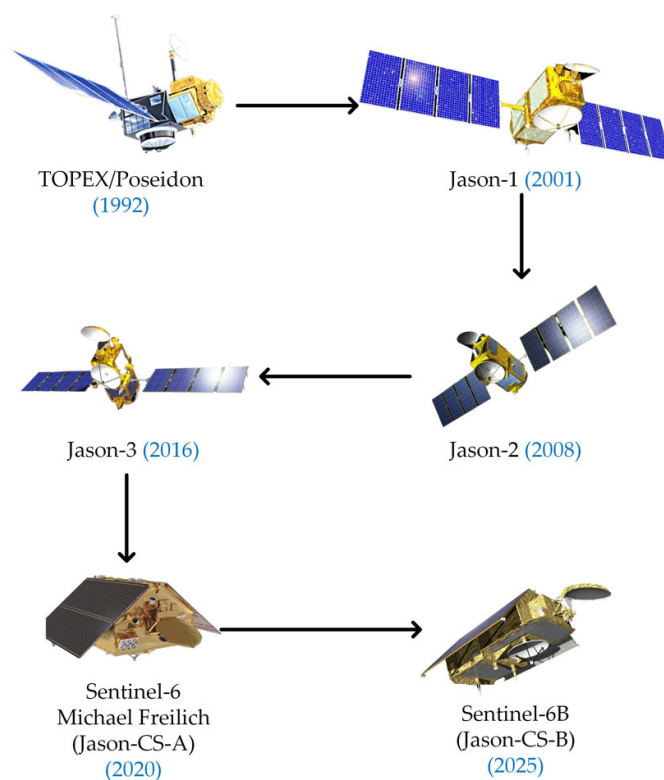

**Figure S1:** The Poseidon series altimeter of Jason satellite.
